# Supplementary material for: Maternal DNMT3A-dependent de novo methylation of the paternal genome inhibits gene expression in the early embryo
Source: PubMed Central journal article supplement (PMC7591512; doi:10.1038/s41467-020-19279-7), 2020-10-27
Supplement: 41467_2020_19279_MOESM3_ESM.pdf [file 41467_2020_19279_MOESM3_ESM.pdf]

## **Description of Additional Supplementary Files**

File Name: Supplementary Data 1

Description: Processed data and lists of genes used to generate figures in this study.

File Name: Supplementary Data 2

Description: List of datasets mined and generated in this study.

File Name: Supplementary Data 3

Description: Genome-wide DNAm levels reported in Figure 1a.

File Name: Supplementary Data 4

Description: Genome-wide DNAm levels reported in Supplementary Figure 3a.

File Name: Supplementary Data 5

Description: Genome-wide DNAm levels reported in Supplementary Figure 6a.

File Name: Supplementary Data 6

Description: Gene expression data reported in Supplementary Figure 7b.
